# Supplementary material
Source: PubMed Central journal article supplement (PMC4188218)

**A****6 hours**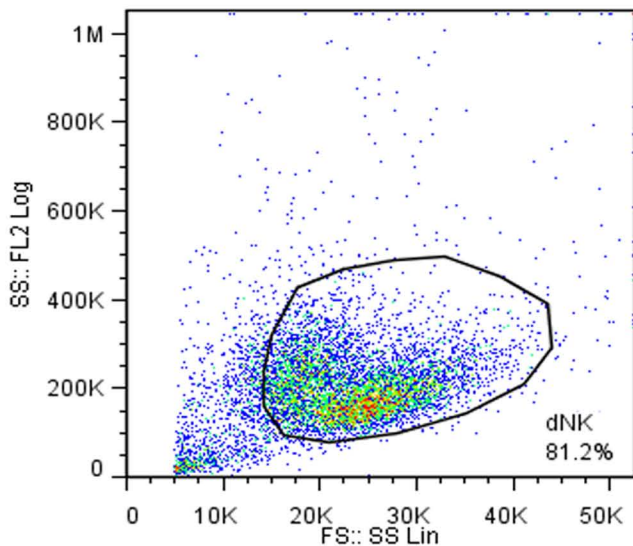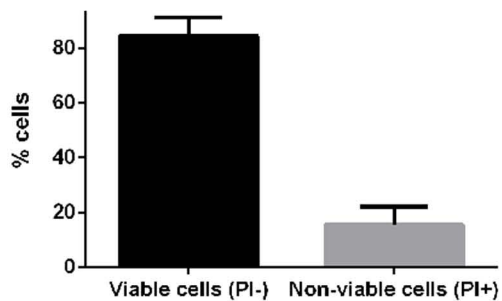**B****24 hours**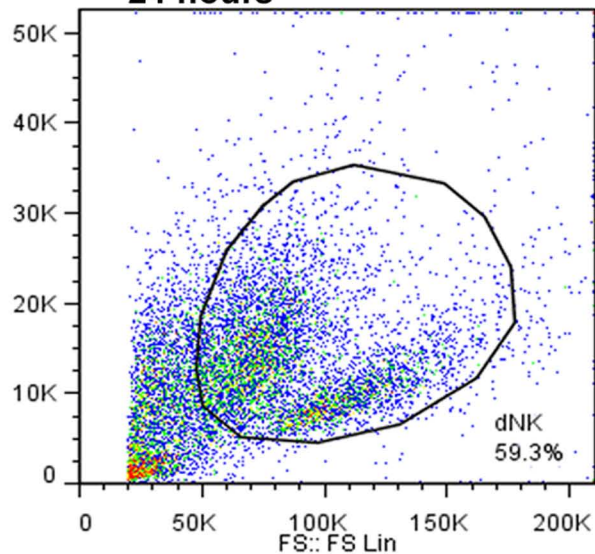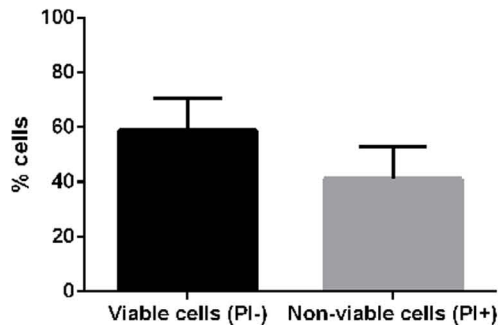

Supplement: mmc1.pdf [file mmc1.pdf]
